# Supplementary material for: Effect of metal ions on the physical properties of multilayers from hyaluronan and chitosan, and the adhesion, growth and adipogenic differentiation of multipotent mouse fibroblasts
Source: Royal Society of Chemistry journal article supplement (doi:10.1039/d1sm00405k), 2021-01-01
Supplement: d1sm00405k1.pdf [file d1sm00405k1.pdf]

## **Supplemental information**

### **Effect of metal ions on physical properties of multilayers from hyaluronan and chitosan and adhesion and growth of multipotent mouse fibroblasts**

Husnia Kindi<sup>1</sup>, Matthias Menzel<sup>2</sup>, Andreas Heilmann<sup>2</sup>, Christian Schmelzer<sup>2</sup>, M. Herzberg<sup>3</sup>, Bodo Fuhrmann<sup>4,7</sup>, Gloria Gallego-Ferrer<sup>5,6</sup>, Thomas Groth<sup>1,7,8</sup>

#### **Author address**

<sup>1</sup>Department Biomedical Materials, Institute of Pharmacy, Martin Luther University Halle-Wittenberg, Heinrich-Damerow-Strasse 4, 06120 Halle (Saale), Germany.

<sup>2</sup>Biological and Macromolecular Materials Business Unit, Fraunhofer Institute for Microstructure of Materials and Systems IMWS, Halle (Saale), Germany.

<sup>3</sup>Molecular Microbiology, Institute for Biology/Microbiology, Martin-Luther-University, Halle-Wittenberg, Germany.

<sup>4</sup>Institute of Physics, Martin Luther University Halle-Wittenberg, 06099 Halle (Saale), Germany.

<sup>5</sup>Centre for Biomaterials and Tissue Engineering, Universitat Politècnica de València, Caminode Veras/n, 46022 Valencia, Spain.

<sup>6</sup>Biomedical Research Networking Centre in Bioengineering, Biomaterials and Nanomedicine (CIBER - BBN), 46022 Valencia, Spain.

<sup>7</sup>Interdisciplinary Center of Materials Science, Martin Luther University Halle-Wittenberg, 06120 Halle (Saale), Germany.

<sup>8</sup>Laboratory of Biomedical Nanotechnologies, Institute of Bionic Technologies and Engineering, I.M. Sechenov First Moscow State University, 119991, Trubetskaya street 8, Moscow, Russian Federation

#### **Corresponding author**

Email: [thomas.groth@pharmazie.uni-halle.de](mailto:thomas.groth@pharmazie.uni-halle.de)

## 1. Ellipsometry

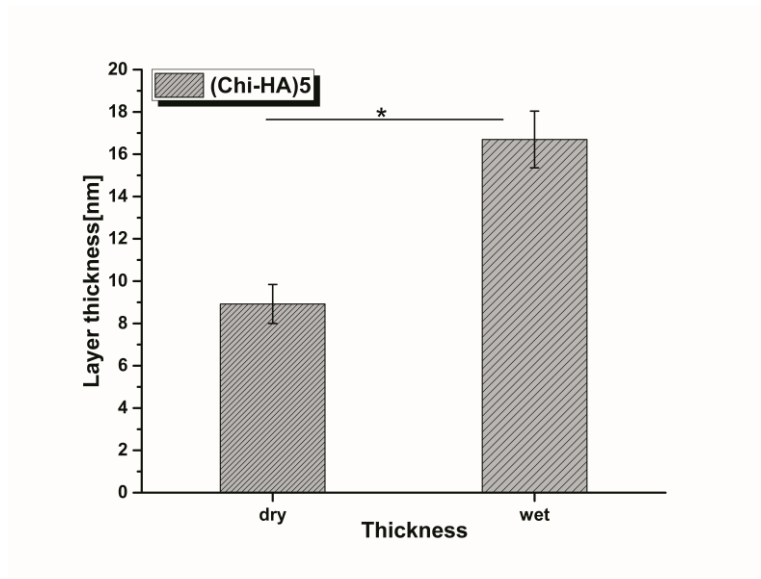

**Figure S1:** Calculated dry and wet thicknesses of  $[\text{Chi}/\text{HA}]_5$  multilayers studied by ellipsometry. Results represent means  $\pm$  SD.

## 2. Freestanding film formation

The LbL method was used to fabricate  $[\text{CHI}/\text{HA}]_{100}$  freestanding multilayer films. Films containing 100 bilayers of (2 mg/ mL) Chitosan (Chi) and (5 mg/ mL) Hyaluronic acid (HA) were fabricated using an automated dip coating device (DR01, Riegler & Kirstein, Berlin, Germany). The freestanding films Chi/HA were assembled on poly (propylene) (76 X 26mm<sup>2</sup>, Halle, Germany) to permit the fabrication and detachment of films. The dip-coating process was performed as reported previously <sup>1</sup>. For cross-linking with metal ions, the films were detached from the substratum and cut into circular disks of 12 mm diameter and placed inside 24-well plates. Then the films were incubated with metal ions solutions ( $\text{Cu}^{2+}$ ,  $\text{Co}^{2+}$ ,  $\text{Ca}^{2+}$ , and  $\text{Fe}^{3+}$ ) of highest concentration for 30 min incubation followed by three times rinsing with 0.15 M (NaCl) for 5 min each. (**Figure S2**)

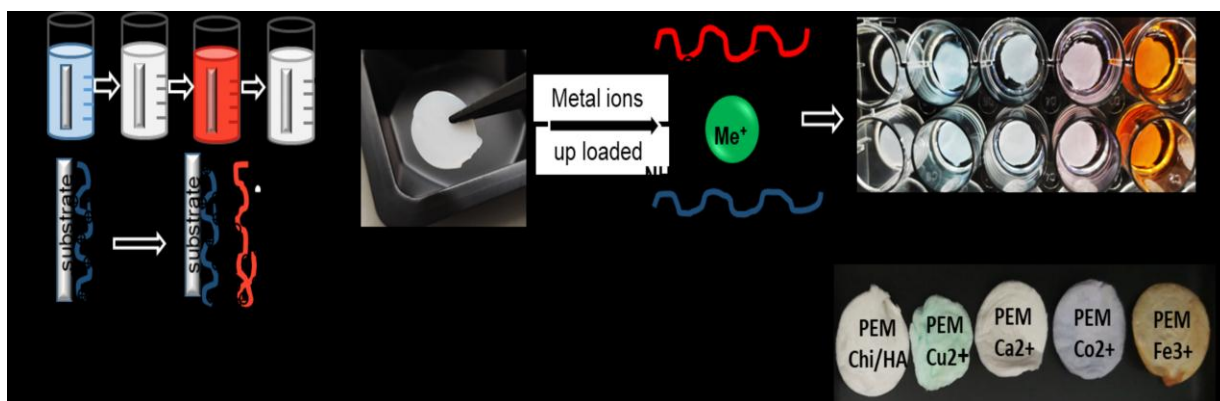

**Figure S2:** Scheme of freestanding multilayer film preparation with subsequent crosslinking with high concentrations of metal ions and photographs of the resulting films with obvious staining by the metal ions.

### 3. FTIR spectroscopy

**Figure S3** shows that the spectrum of pure Chi presents a broad absorbance band at about  $3275\text{ cm}^{-1}$  related to the corresponding amine N–H and hydroxyl group O–H, including those from residual water. Furthermore two bands at  $2980$  and  $2881\text{ cm}^{-1}$  caused by stretching of C–H; the absorption band of amide I stretching at  $1651\text{ cm}^{-1}$ , and bending vibrations of the N–H (N-acetylated residues, amide II band) at  $1587\text{ cm}^{-1}$  were found <sup>2</sup>. Amine deformation vibrations usually produce strong bands in the range of  $1638\text{--}1575\text{ cm}^{-1}$ . Hence, the peak at  $1587\text{ cm}^{-1}$  can be also a contribution of the N–H bending of the amine, as previously discussed <sup>3</sup>. The peaks at  $1419$  and  $1377\text{ cm}^{-1}$  belong to the deformation of C–H and the stretching of C–N, respectively <sup>4-5</sup>. The absorption bands at  $1150\text{ cm}^{-1}$  (anti-symmetric stretching of the C–O–C bridge and C–N stretch),  $1075\text{ cm}^{-1}$ ,  $1050\text{ cm}^{-1}$  and  $1030\text{ cm}^{-1}$  (skeletal vibrations involving the C–O stretching) are characteristics of its saccharide structure<sup>2,3</sup>.

The spectrum of HA (see **Figure S3** as well) shows an intense band that has its maximum at about  $3275\text{ cm}^{-1}$  attributed to N–H and O–H groups engaged in hydrogen bond formation and some residual water after drying of free-standing films. The band at around  $2900\text{ cm}^{-1}$  can be referred to stretching vibration of the C–H bonds. The carbonyl band  $\nu_{\text{C=O}}$  of the (protonated) carboxylic group COOH appears at  $1730\text{ cm}^{-1}$ ; this group has also been assigned to the peak at  $1608\text{ cm}^{-1}$  <sup>6</sup>. This zone is where amide I and amide II are expected

and probably their contributions superpose, the peak at  $1555\text{ cm}^{-1}$  attributed to the amide II vibration <sup>7</sup>. The bands at about  $1400\text{ cm}^{-1}$  are also characteristic of hyaluronic acid and correspond to C=O and C-O bonds in the carboxylate<sup>8</sup>. The intense band extending between  $1200$  and  $900\text{ cm}^{-1}$  corresponds to the saccharide unit C-O-C stretching vibration ( $1150\text{ cm}^{-1}$  O-bridge,  $1070\text{ cm}^{-1}$  and  $1024\text{ cm}^{-1}$  C-O vibration) <sup>9</sup>.

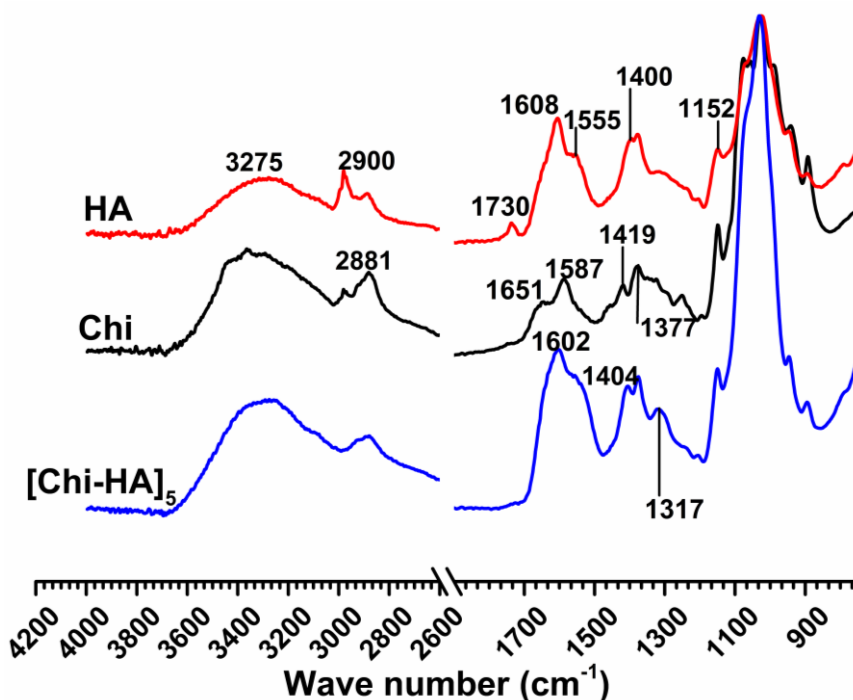

**Figure S3:** FTIR spectra of pure chitosan (Chi), hyaluronic acid (HA) and dry  $[\text{Chi/HA}]_{100}$  multilayer films

#### 4. Cytotoxicity studies

For cytotoxicity studies, cells were seeded in 96 well plates at a density of  $5 \times 10^4$  cells/mL in EBM supplemented with 10% FBS and 1% pen/strep and incubated at  $37^\circ\text{C}$  in a humidified 5%  $\text{CO}_2$ /95% air atmosphere with different (concentration and type) metal ions for 24 h and 72 h. The metabolic activity of C3 H10T1/2 cells was determined using the non-toxic QBlue<sup>®</sup> assay (BioChain, USA). Therefore, the old medium was carefully aspirated and 200  $\mu\text{L}$  of pre-warmed EBM containing the QBlue reagent (ratio 1:10) was added to each well. The samples were again incubated at  $37^\circ\text{C}$  for 3 h, and then 100  $\mu\text{L}$  of supernatant from each well was transferred to a 96-well black plate (Greiner). The fluorescence intensities were

measured at an excitation wavelength of 544 nm and an emission wavelength of 590 nm with a fluorescence plate reader (BMGLABTECH, Fluostar OPTIMA, Offenburg, Germany).

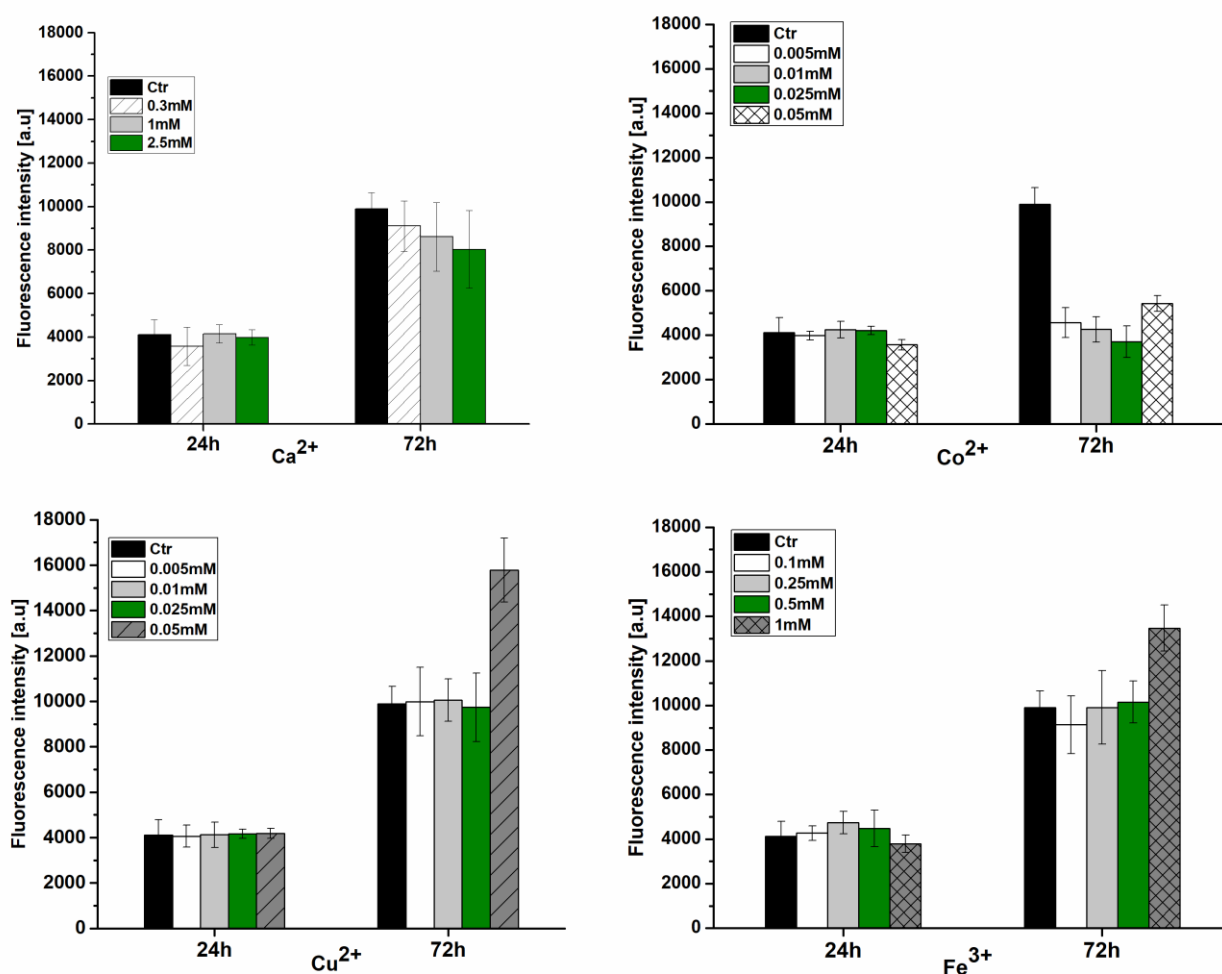

**Figure S4:** C3H10T1/2 cells seeded on 96 well plate for 24h. The cells were incubated with EBSM medium with 10%FBS and addition of different metal ions (type and concentration). Cell viability was determined by QBlue assay after 24 and 72 h of culture. Results are means  $\pm$  SD.

To clarify whether a reduced quantity of cells on multilayers cross-linked with metal ions is due to toxic effects, cell viability studies were performed by pre-culturing C3H10T1/2 cells on 96 well plates and exposing them to solutions of the chloride salts of the metal ions in a cell culture medium supplemented with 10% FBS for 24 and 72 h as shown in **Figure S 4**. It was found that micro molar concentrations of Co<sup>2+</sup> ions (5  $\mu$ M) had no cytotoxic effect after

24 h, but inhibited further proliferation of cells in this concentration range up to 50  $\mu\text{M}$ . By contrast,  $\text{Cu}^{2+}$  did not show any cytotoxicity and growth inhibition in comparison to the control at the same concentration range. In addition, calcium and iron ions that were applied in the 2.5 mM range did not show any signs of cytotoxicity or growth-inhibiting effects on C3H10T1/2 cells. However, significant effect on cell growth was seen for  $\text{Co}^{2+}$  which seems to inhibit cell growth during the time of incubation already at the lowed concentration of 5  $\mu\text{M}$ .

## Reference:

1. Apte, G.; Repanas, A.; Willems, C.; Mujtaba, A.; Schmelzer, C. E.; Raichur, A.; Syrowatka, F.; Groth, T., Effect of Different Crosslinking Strategies on Physical Properties and Biocompatibility of Freestanding Multilayer Films Made of Alginate and Chitosan. *Macromolecular Bioscience* **2019**, *19* (11), 1900181.
2. Smitha, B.; Sridhar, S.; Khan, A., Chitosan–sodium alginate polyion complexes as fuel cell membranes. *European Polymer Journal* **2005**, *41* (8), 1859-1866.
3. Lawrie, G.; Keen, I.; Drew, B.; Chandler-Temple, A.; Rintoul, L.; Fredericks, P.; Grøndahl, L., Interactions between alginate and chitosan biopolymers characterized using FTIR and XPS. *Biomacromolecules* **2007**, *8* (8), 2533-2541.
4. Cardenas, G.; Miranda, S. P., FTIR and TGA studies of chitosan composite films. *Journal of the Chilean Chemical Society* **2004**, *49* (4), 291-295.
5. Qu, J.; Hu, Q.; Shen, K.; Zhang, K.; Li, Y.; Li, H.; Zhang, Q.; Wang, J.; Quan, W., The preparation and characterization of chitosan rods modified with  $\text{Fe}^{3+}$  by a chelation mechanism. *Carbohydrate research* **2011**, *346* (6), 822-827.
6. Lewandowska, K., Miscibility Studies of Hyaluronic Acid and Poly (Vinyl Alcohol) Blends in Various Solvents. *Materials* **2020**, *13* (21), 4750.
7. Lee, E. J.; Kang, E.; Kang, S.-W.; Huh, K. M., Thermo-Irreversible Glycol Chitosan/Hyaluronic Acid Blend Hydrogel for Injectable Tissue Engineering. *Carbohydrate Polymers* **2020**, 116432.
8. Haxaire, K.; Marechal, Y.; Milas, M.; Rinaudo, M., Hydration of polysaccharide hyaluronan observed by IR spectrometry. I. Preliminary experiments and band assignments. *Biopolymers: Original Research on Biomolecules* **2003**, *72* (1), 10-20.
9. Wu, Y., Preparation of low-molecular-weight hyaluronic acid by ozone treatment. *Carbohydrate polymers* **2012**, *89* (2), 709-712.
